# Supplementary material for: A non-replicative antibiotic resistance-free DNA vaccine delivered by the intranasal route protects against canine leishmaniasis
Source: Front Immunol. 2023 Sep 18;14:1213193. doi: 10.3389/fimmu.2023.1213193 (PMC10543895; doi:10.3389/fimmu.2023.1213193)
Supplement: Supplementary file 1 [file Table_1.xlsx]

## Sheet: Hoja1
Table S1. Normality and variance homogeneity tests.
Figure 2A	Clinical signs
PBS/PBS	pPAL-LACK/pPAL-LACK	PBS/PBS	pPAL-LACK/pPAL-LACK	PBS/PBS	pPAL-LACK/pPAL-LACK	PBS/PBS	pPAL-LACK/pPAL-LACK
120	120	180	180	240	240	300	300
Kolmogorov-Smirnov
0.30964	0.30211	0.27294	0.41954	0.249	0.12797	0.71009	0.07612	Conclusion: the data do not significantly differ from a normal distribution in any group.
Levene
0.201161		0.199537		0.79617		0.072		Conclusion: The requirement of homogeneity is met in every group.
Figure 2B	Parasite burden in bone marrow
PBS/PBS	pPAL-LACK/pPAL-LACK	PBS/PBS	pPAL-LACK/pPAL-LACK	PBS/PBS	pPAL-LACK/pPAL-LACK	PBS/PBS	pPAL-LACK/pPAL-LACK
120	120	180	180	240	240	300	300
Kolmogorov-Smirnov
0.00408	0.03283	0.0122	0.01404	0.0006	0.0002	0.00029	0.00086	Conclusion: the data significantly differ from a normal distribution in every group.
Levene
0.002903		0.12889		0.016137		0.003312		Conclusion: The requirement of homogeneity is not met in any group.
Figure 2C
Parasite burden in spleen		Parasite burden in liver
PBS/PBS	pPAL-LACK/pPAL-LACK	PBS/PBS	pPAL-LACK/pPAL-LACK
300	300	300	300
Kolmogorov-Smirnov
9e-05	0.00243	0.00065	0.00185
Levene
0.006799		0.00706
Figure 4
T CD4
Estim. CLA
PBMC								Spleen		Liver
PBS/PBS	pPAL-LACK/pPAL-LACK	PBS/PBS	pPAL-LACK/pPAL-LACK	PBS/PBS	pPAL-LACK/pPAL-LACK	PBS/PBS	pPAL-LACK/pPAL-LACK	PBS/PBS	pPAL-LACK/pPAL-LACK	PBS/PBS	pPAL-LACK/pPAL-LACK
120	120	180	180	240	240	300	300	300	300	300	300
Kolmogorov-Smirnov								Kolmogorov-Smirnov
0.00074	0.0703	0.00032	0.01052	0.01168	0.00663	0.00502	0.00157	0.01896	0.25477	0.00245	0.01822
Levene								Levene
0.251496		0.412571		0.199635		0.06108		0.044747		0.016549
Estim. LACK
PBMC								Spleen		Liver
PBS/PBS	pPAL-LACK/pPAL-LACK	PBS/PBS	pPAL-LACK/pPAL-LACK	PBS/PBS	pPAL-LACK/pPAL-LACK	PBS/PBS	pPAL-LACK/pPAL-LACK	PBS/PBS	pPAL-LACK/pPAL-LACK	PBS/PBS	pPAL-LACK/pPAL-LACK
120	120	180	180	240	240	300	300	300	300	300	300
Kolmogorov-Smirnov								Kolmogorov-Smirnov
0.00049	0.00078	0.01109	0.00036	0.0032	0.00237	0.00163	0.00252	0.01081	0.24327	0.00071	0.0042
Levene								Levene
0.340774		0.007014		0.770316		0.444289		0.075838		0.060576
Figure 5
IFN-g
Estim. CLA
PBMC								Spleen		Liver
PBS/PBS	pPAL-LACK/pPAL-LACK	PBS/PBS	pPAL-LACK/pPAL-LACK	PBS/PBS	pPAL-LACK/pPAL-LACK	PBS/PBS	pPAL-LACK/pPAL-LACK	PBS/PBS	pPAL-LACK/pPAL-LACK	PBS/PBS	pPAL-LACK/pPAL-LACK
120	120	180	180	240	240	300	300	300	300	300	300
Kolmogorov-Smirnov								Kolmogorov-Smirnov
0.00634	0.05563	0.15087	0.73378	0.20294	0.45579	0.00941	0.31596	0.07336	0.17671	0.02303	0.02119
Levene								Levene
<0,00001		0.653969		0.004673		<0,00001		0.009777		0.005344
Estim. LACK
PBMC								Spleen		Liver
PBS/PBS	pPAL-LACK/pPAL-LACK	PBS/PBS	pPAL-LACK/pPAL-LACK	PBS/PBS	pPAL-LACK/pPAL-LACK	PBS/PBS	pPAL-LACK/pPAL-LACK	PBS/PBS	pPAL-LACK/pPAL-LACK	PBS/PBS	pPAL-LACK/pPAL-LACK
120	120	180	180	240	240	300	300	300	300	300	300
Kolmogorov-Smirnov								Kolmogorov-Smirnov
N/A	0.64197	N/A	0.81517	N/A	0.74367	N/A	0.52269	0.0126	0.19189	N/A	0.0024
Levene								Levene
3.4e-05		0.000138		0.000149		2.3e-05		0.036847		0.078472
Figure 6
IL-10
Stim. CLA
PBMC								Spleen		Liver
PBS/PBS	pPAL-LACK/pPAL-LACK	PBS/PBS	pPAL-LACK/pPAL-LACK	PBS/PBS	pPAL-LACK/pPAL-LACK	PBS/PBS	pPAL-LACK/pPAL-LACK	PBS/PBS	pPAL-LACK/pPAL-LACK	PBS/PBS	pPAL-LACK/pPAL-LACK
120	120	180	180	240	240	300	300	300	300	300	300
Kolmogorov-Smirnov								Kolmogorov-Smirnov
0.3044	0.01178	0.50738	0.43017	0.627	0.03861	0.6718	0.11576	0.14576	0.45095	0.79921	0.00036
Levene								Levene
0.487209		0.657673		0.464399		0.854695		5.4e-05		0.139897
Stim. LACK
PBMC								Spleen		Liver
PBS/PBS	pPAL-LACK/pPAL-LACK	PBS/PBS	pPAL-LACK/pPAL-LACK	PBS/PBS	pPAL-LACK/pPAL-LACK	PBS/PBS	pPAL-LACK/pPAL-LACK	PBS/PBS	pPAL-LACK/pPAL-LACK	PBS/PBS	pPAL-LACK/pPAL-LACK
120	120	180	180	240	240	300	300	300	300	300	300
Kolmogorov-Smirnov								Kolmogorov-Smirnov
N/A	0.12017	N/A	0.16653	0.21449	0.66033	0.00073	0.30916	0.09041	0.31959	N/A	0.00717
Levene								Levene
0.00023		1e-05		0.362894		<0,00001		0.996125		0.00042
